# Supplementary material
Source: Elsevier journal article supplement (https://www.sciencedirect.com/science/article/pii/S1130862122000511)
Supplement: mmc1 [file S1130862122000511:mmc1.doc]

**APÉNDICES**

**Tabla A.1** “Selección de estudios”

Número de artículos después de eliminar duplicados

(N= 14)

Número de artículos con texto íntegro

(N=31)

Elegibilidad

Identificación

Número de artículos excluidos después de la lectura del resumen

(N=4)

Motivo: no incluyen los criterios de inclusión de la población.

Número de artículos incluidos después de la lectura del resumen

(N=10)

Número de artículos incluidos después de la lectura del texto íntegro

(N=9)

Número de artículos excluidos por no abordar el tema

(N=1)

Número de artículos incluidos

(N=9)

Inclusión

Selección

Artículos identificados en la investigación en las bases de datos por título

(N=40)

*- WebofScience (N=7)*

*- PUBMED (N=3)*

*- SCOPUS (N=11)*

*- EBSCO HOST (N=19)*

*From:*  Moher D, Liberati A, Tetzlaff J, Altman DG, The PRISMA Group (2009). *P*referred *R*eporting *I*tems for *S*ystematic Reviews and *M*eta-*A*nalyses: The PRISMA Statement. PLoS Med 6(6): e1000097. doi:10.1371/journal.pmed1000097

**Tabla A.2** Datos de los estudios

| **Autor/ Año** | **Artículo** | **Objetivo del estudio** | **Principales conclusiones** |
| --- | --- | --- | --- |
| *Codier & Codier*  (2015) | Do emergency nurses have enough emotional intelligence? | Describir el trabajo emocional y la importancia de las habilidades de inteligencia emocional para enfermeras de urgencias. | El Modelo de Habilidad de Salovey y Mayer es el que más se identifica con la enfermería, siendo esencial para mejorar la satisfacción de las enfermeras y prevenir el *burnout*, siendo esencial para mantener la seguridad del paciente, mejorar el trabajo en equipo, establecer una comunicación interdisciplinar eficaz. |
| *Towell et al.* (2013) | The emotional intelligence of a group of critical-care nurses in South Africa | Identificar la inteligencia emocional de enfermeras de cuidados críticos que trabajan en diferentes contextos. | Enfermeras emocionalmente inteligentes presentan niveles reducidos de estrés y de agotamiento.  Fue relacionado el concepto de resiliencia con inteligencia emocional.  Enfermeras de mayor edad y con experiencia profesional que trabajan en unidades de cuidados críticos presentan niveles elevados de inteligencia emocional. |
| *Towell et al.* (2015) | Model of facilitation of emotional intelligence to promote wholeness of neophyte critical care nurses in South Africa | Desarrollar y describir un modelo de inteligencia emocional para facilitar la integración de enfermeras en las unidades de cuidados intensivos en Sudáfrica. | Enfermeras con más experiencia son más resilientes y presentan un elevado índice de inteligencia emocional.  La resiliencia y la inteligencia emocional son conceptos recientes, pero importantes en el desarrollo de enfermeras.  La integración de enfermeras en los servicios de terapia intensiva debe ser realizada por enfermeras con más experiencia en esta área, puesto que poseen un mayor conocimiento teórico y mayor destreza técnica, son más resilientes y presentan un elevado índice de inteligencia emocional. |
| Encarnação et al.  (2018) | Inteligência emocional: fatores influenciadores e impacto nos enfermeiros em cuidados intensivos | Identificar los factores que influyen la inteligencia emocional de enfermeras de cuidados intensivos. | La inteligencia emocional tiene impacto en enfermeras a nivel personal, profesional y en el proceso de cuidado.  La personalidad y la formación influyen en la inteligencia emocional de la enfermera de cuidados intensivos. |
| *Sharif et al.* (2013) | Teaching Emotional Intelligence to Intensive Care Unit Nurses and their General Health: A Randomized Clinical Trial | Determinar el efecto en la salud general de enfermeras de unidades de terapia intensiva al enseñar la inteligencia emocional. | Enfermeras con un nivel de inteligencia emocional alto presentan una mejor capacidad para enfrentar los desafíos de la vida y presentan mejor salud mental.  Se verificaron efectos positivos de la enseñanza de los componentes de la inteligencia emocional en la salud general de enfermeras.  La enseñanza de inteligencia emocional dio lugar a un efecto positivo en la salud general de enfermeras. |
| *Delpasand et al.*  (2011) | The relationship between emotional intelligence and occupational burnout among nurses in critical care units | Determinar la relación entre *burnout* ocupacional e inteligencia emocional entre enfermeras de unidades de terapia intensiva de los hospitales de seguridad social en Teheran. | Cuanto mayor es el nivel de inteligencia emocional, menor es el índice de *burnout* ocupacional en términos de agotamiento emocional.  Existe una relación directa y positiva entre inteligencia emocional y realización personal. Los profesionales de la salud con un elevado nivel de inteligencia emocional presentan mayor satisfacción profesional y más éxito en la prestación de cuidados, presentando menor cansancio profesional. |
| *Nagel et al.* (2016) | The emotional intelligence of registered nurses commencing critical care nursing | Explorar y describir la inteligencia emocional de enfermeras en proceso de integración en las unidades de terapia intensiva en un grupo hospitalario privado en Gauteng, Sudáfrica | Enfermeras más experimentadas presentan niveles más elevados de inteligencia emocional, por lo que van a contribuir en el desarrollo de la inteligencia emocional de enfermeras con menos experiencia profesional en cuidados intensivos.  Niveles elevados de inteligencia emocional están directamente relacionados con la actualización de los conocimientos a lo largo de la carrera profesional. |
| *Tofighi et al.* (2015) | Relationship between emotional intelligence and organizational citizenship behavior in critical and emergency nurses in south east of iran | Identificar la relación entre la inteligencia emocional y el comportamiento de ciudadanía organizacional en enfermeras de cuidados críticos y de urgencias en hospitales de enseñanza supervisados por la Kerman Medical University, en el sudeste de Irán. | Existe relación significativa entre algunas categorías de inteligencia emocional y el comportamiento de ciudadanía organizacional.  Existe una relación significativa entre la categoría de auto gestión de la inteligencia emocional, la experiencia emocional y la edad.  Enfermeras están expuestas a situaciones de estrés en su práctica de cuidados por lo que la inteligencia emocional y la salud mental pueden facilitar un adecuado comportamiento de ciudadanía.  Los gestores de la salud deben organizar políticas y procedimientos sistemáticos y dinámicos para tratar la inteligencia emocional y el comportamiento de ciudadanía organizacional, con el fin de ayudar las enfermeras de cuidados intensivos y de servicios de urgencias. |
| *Rezaei & Salehi*  (2018) | A Study of the Relationship between Emotional Intelligence and Patient Safety Culture among Emergency Nurses in Selected Hospitals in Shiraz in 2017 | Investigar la relación entre las dimensiones de la inteligencia emocional y la cultura de seguridad del paciente en enfermeras del servicio de urgencias. | Existe una relación positiva y significativa entre las dimensiones de inteligencia emocional y la cultura de seguridad del paciente.  El desarrollo de la inteligencia emocional en enfermeras puede promover su crecimiento personal y profesional y mejorar el estatus de la cultura de seguridad del paciente, aumentando la productividad de enfermeras y la satisfacción de los pacientes. |
